# Supplementary material for: A Green Analytical Method Combined with Chemometrics for Traceability of Tomato Sauce Based on Colloidal and Volatile Fingerprinting
Source: MDPI journal article supplement (doi:10.3390/molecules27175507), 2022-08-27
Supplement: s1 [file s1]

Article

# A Green Analytical Method Combined with Chemometrics for Traceability of Tomato Sauce Based on Colloidal and Volatile Fingerprinting

Alessandro Zappi<sup>1</sup>, Valentina Marassi<sup>1,2,\*</sup>, Nicholas Kassouf<sup>1</sup>, Stefano Giordani<sup>1</sup>, Gaia Pasqualucci<sup>1</sup>, Davide Garbini<sup>3</sup>, Barbara Roda<sup>1,2</sup>, Andrea Zattoni<sup>1,2</sup>, Pierluigi Reschiglian<sup>1,2</sup>, Dora Melucci<sup>1,4</sup>

\* Correspondence: [valentina.marassi@unibo.it](mailto:valentina.marassi@unibo.it)

## Supplementary Material

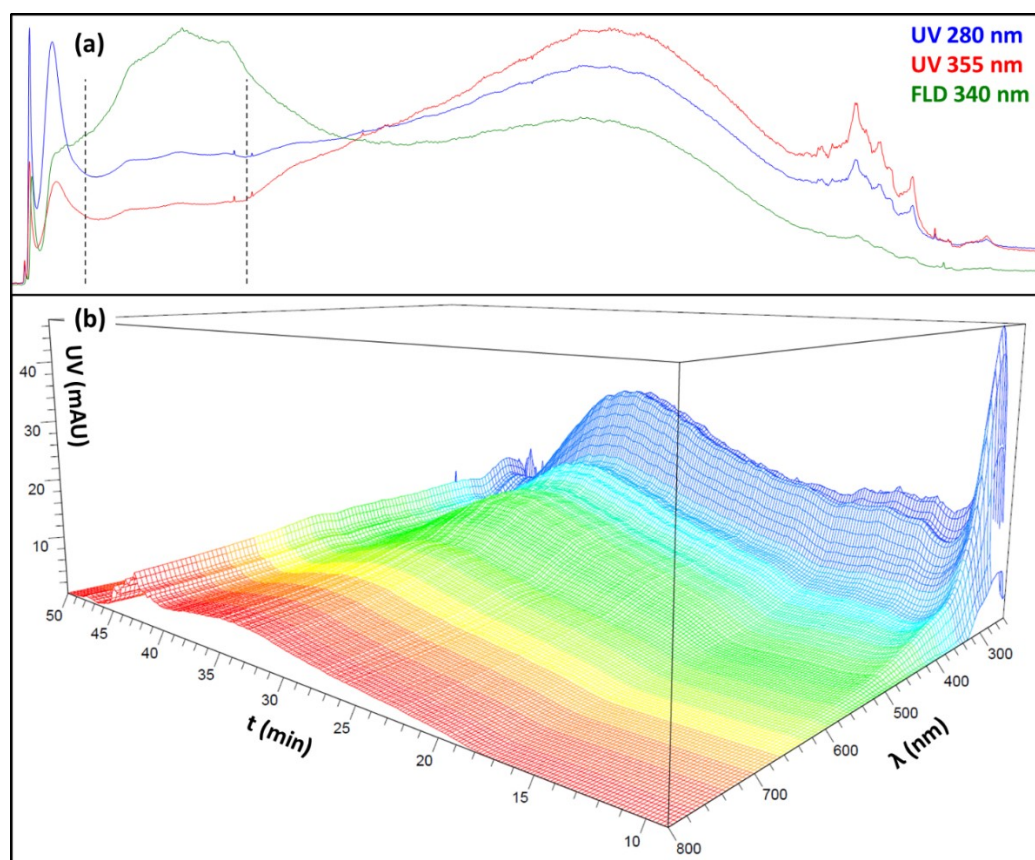

**Figure S1.** Representative AF4-multidetector output of tomato sauce: **a)** overlay of UV absorption (at 280 nm, blue; and at 355 nm, red) and Fluorescence emission (excitation at 280 nm, emission at 340 nm, green)—dashed lines: splitting in the three bands for PCA analysis; and **b)** 3D UV absorption spectrum.

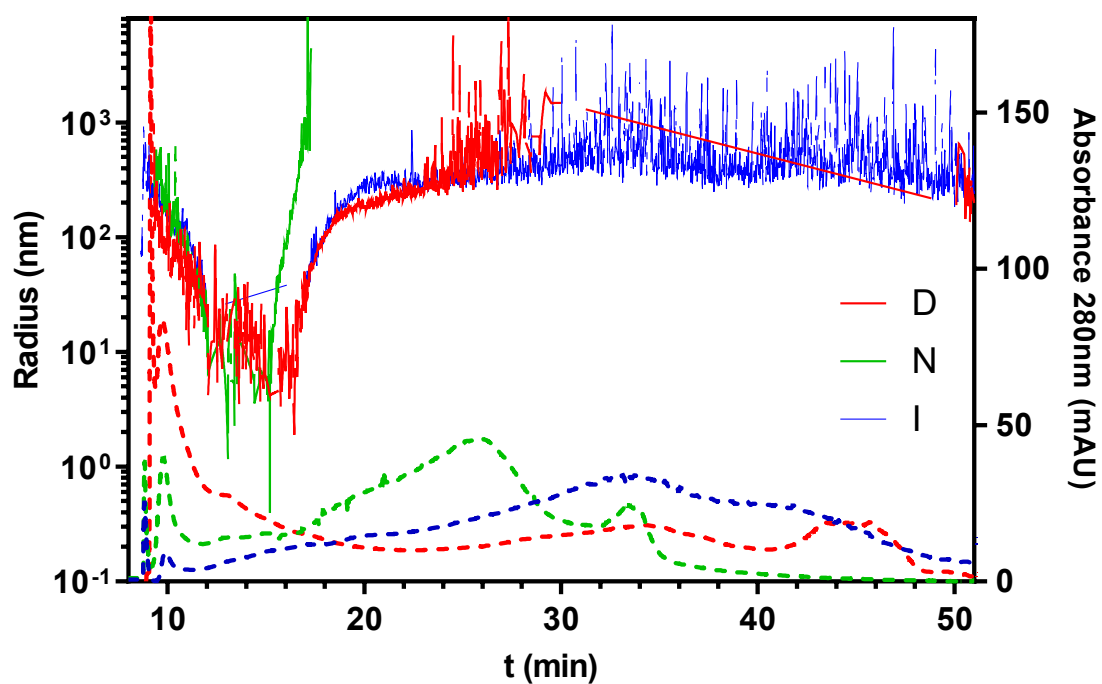

**Figure S2.** The UV-MALS of three representative samples of tomato sauce from manufacturers D, N, and I. Dashed lines: UV fractogram at 280 nm. Solid lines: Gyration radius calculation in the range 10-1000 nm.
